# Supplementary material for: A natural compound obtained from Valeriana jatamansi selectively inhibits glioma stem cells
Source: PubMed Central journal article supplement — Oncol Lett. 2019 Dec 23;19(2):1384–92. doi: 10.3892/ol.2019.11239 (PMC6960388; doi:10.3892/ol.2019.11239), 2019-12-23

Figure S1. <sup>1</sup>H-NMR spectrum (acetone-d<sub>6</sub>, 600 MHz) of rupesin E. NMR, nuclear magnetic resonance; H, hydrogen; ppm, parts per million.

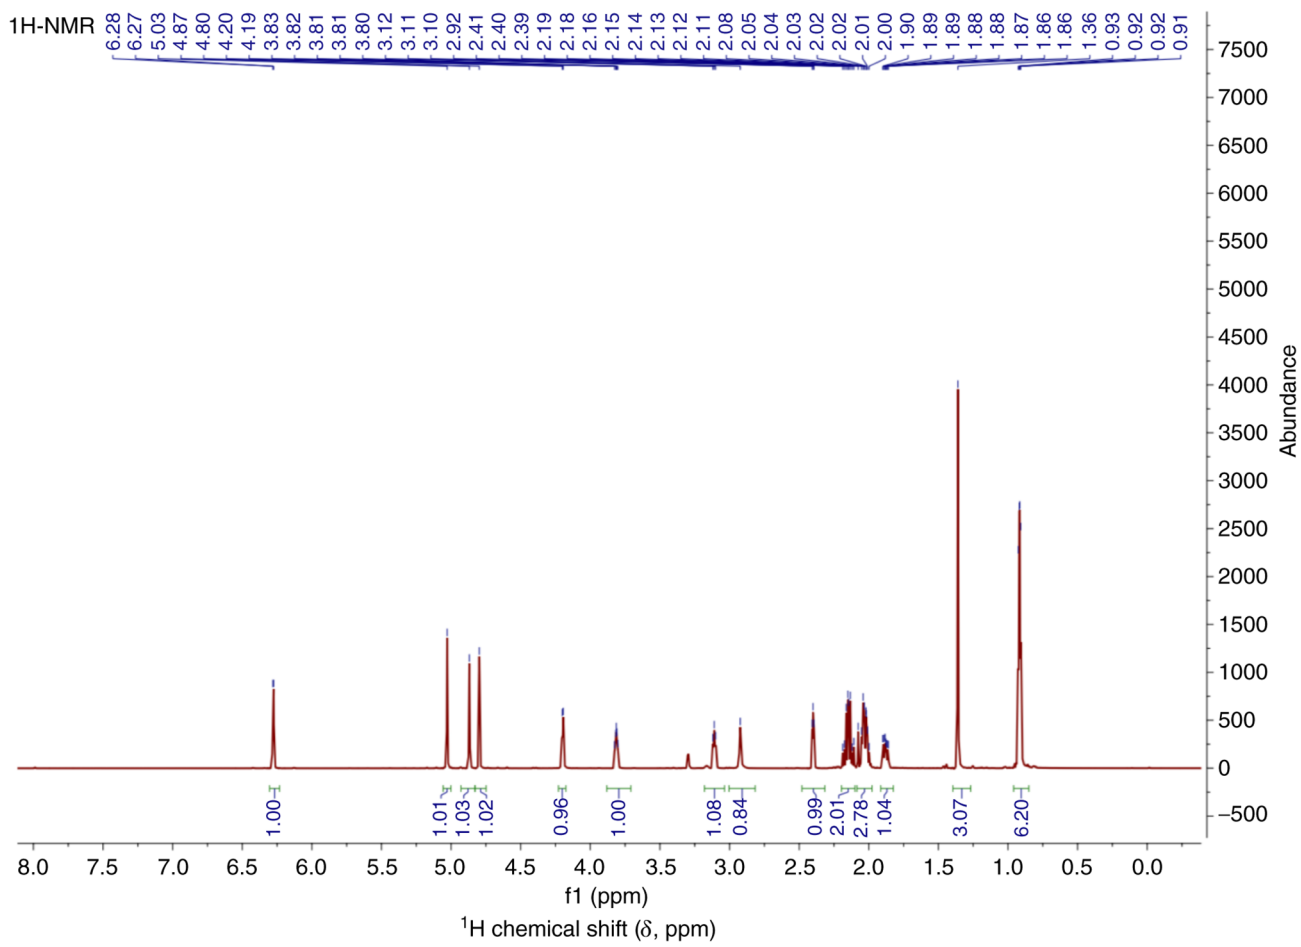

Figure S2.  $^{13}\text{C}$ -NMR spectrum (acetone- $d_6$ , 150 MHz) of rupesin E. NMR, nuclear magnetic resonance; C, carbon; ppm, parts per million.

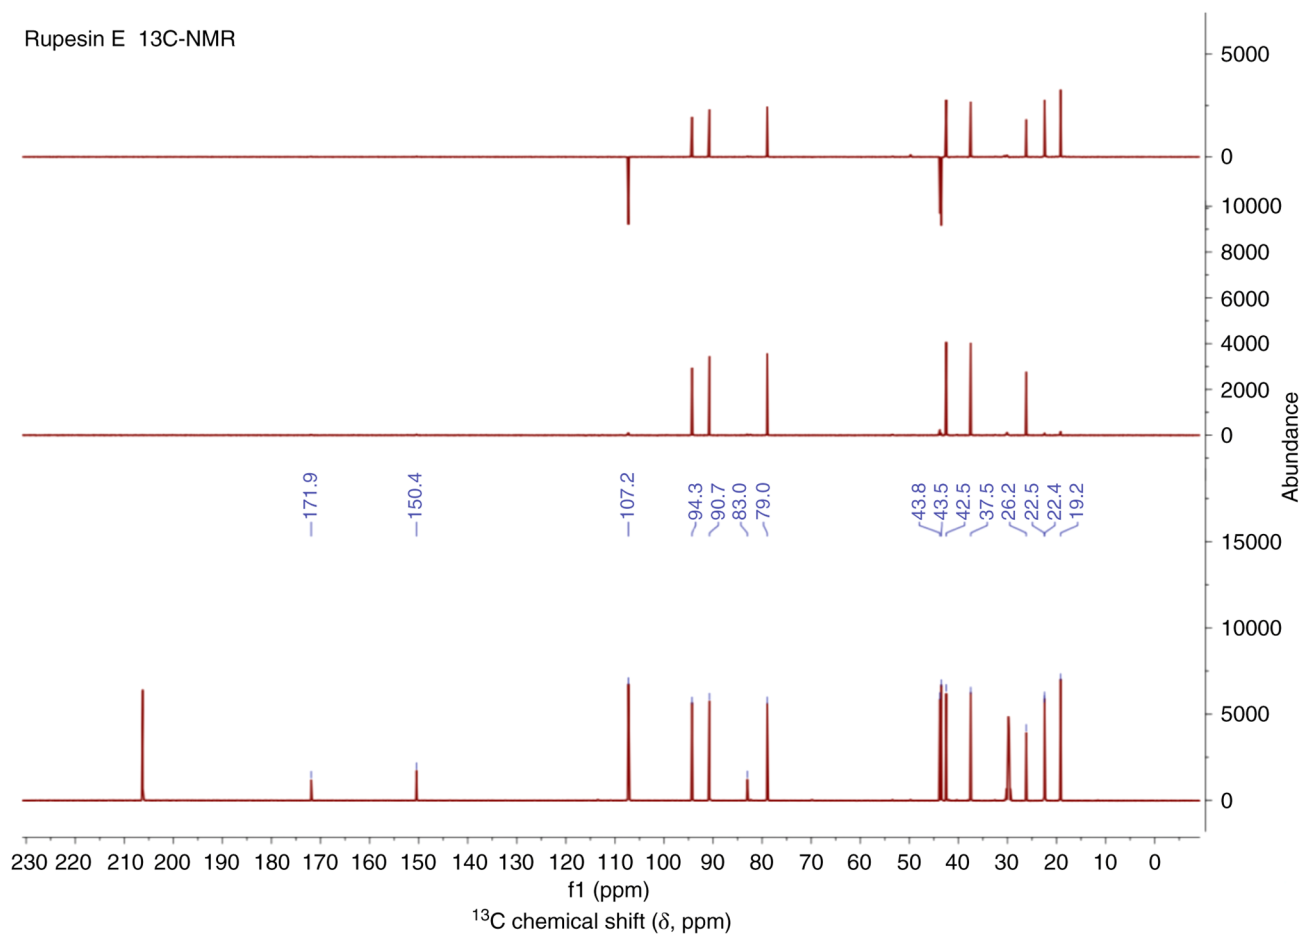

Supplement: Supplementary_Data.pdf [file Supplementary_Data.pdf]
